# Supplementary material for: Beyond the Brain: The Systemic Pathophysiological Response to Acute Ischemic Stroke
Source: PubMed Central journal article supplement — J Stroke. 2020 May 31;22(2):159–72. doi: 10.5853/jos.2019.02978 (PMC7341014; doi:10.5853/jos.2019.02978), 2020-05-31
Supplement: jos-2019-02978-suppl2.pdf [file jos-2019-02978-suppl2.pdf]

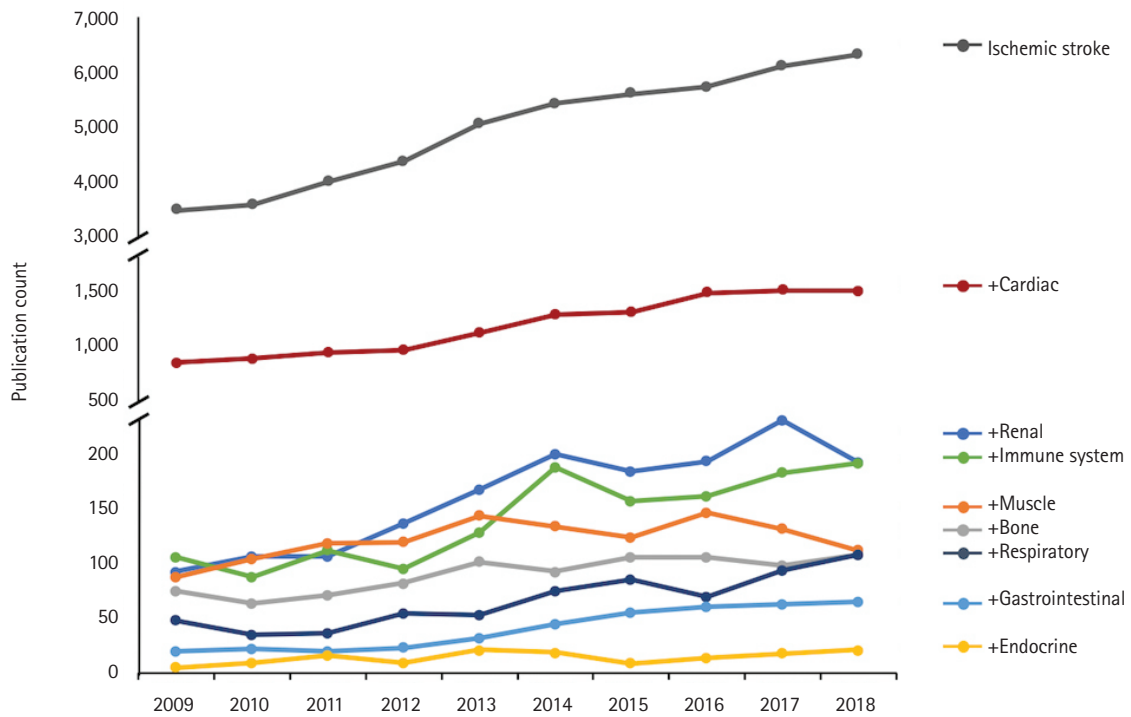

**Supplementary Figure 1.** A decade of ischemic stroke literature. Ischemic stroke drives development of systemic pathologies. Queries of stroke literature by year (National Center for Biotechnology Information and National Library of Medicine database; PubMed) show annual ischemic stroke publications have steadily increased in number since 2009. However, searches of ischemic stroke literature associated with various system-specific terminology (e.g., [(ischemic stroke) AND cardiac]) revealed little attention has been given to peripheral consequences of stroke over the past decade. Indeed, in 2018 when ischemic stroke publications numbered more than 6,000, seven of the eight peripheral systems examined had less than 200 publications, five of which had 100 or less. The eighth system reflected cardiac outcomes in ischemic stroke at around 1,400 publications—more in comparison given the clinical link in cardio- and cerebrovascular research—though still a mere fraction overall. Data are reported as publication count (y-axis; split twice to denote full spread across systems) by publication year (x-axis).
